# Supplementary material for: Assessment of viral RNA in idiopathic pulmonary fibrosis using RNA-seq
Source: BMC Pulm Med. 2020 Apr 3;20:81. doi: 10.1186/s12890-020-1114-1 (PMC7119082; doi:10.1186/s12890-020-1114-1)
Supplement: Supplementary file 1 — Additional file 1: Table S1. Counts for human and virus mapped RNA-seq reads for IPF and control lung RNA. Virus data is shown if at least one read was detected in at least one sample. [file 12890_2020_1114_MOESM1_ESM.xlsx]

## Sheet: Sheet1
	Initial Cohort								Second Cohort								Initial Cohort															Second Cohort
Virus	Control				IPF				Control (Carcinoma)				IPF				Control				IPF											Control (Carcinoma)										IPF
	# of samples	% of samples	Min	Max	# of samples	% of samples	Min	Max	# of samples	% of samples	Min	Max	# of samples	% of samples	Min	Max	3013	3014	3017	3018	2005	2019	2024	2025	2032	2041	2042	2044	2048	2049	2051	100325_HWUSI-EAS1671_0002_616HEAAXX_s_1	100409_HWUSI-EAS1671_0004_6177TAAXX_s_5	100423_HWUSI-EAS1671_0005_61F65AAXX_s_7	100423_HWUSI-EAS1671_0005_61F65AAXX_s_8	100521_HWUSI-EAS1671_0007_61RJGAAXX_s_7	100608_HWUSI-EAS1671_0001_61RL4AAXX_s_6	100608_HWUSI-EAS1671_0001_61RL4AAXX_s_7	100608_HWUSI-EAS1671_0001_61RL4AAXX_s_8	101115_HWUSI-EAS1671_0017_62LBNAAXX_s_3	110118_HWUSI-EAS1671_0022_6159RAAXX_s_3	100325_HWUSI-EAS1671_0002_616HEAAXX_s_3	100409_HWUSI-EAS1671_0004_6177TAAXX_s_7	100409_HWUSI-EAS1671_0004_6177TAAXX_s_8	100423_HWUSI-EAS1671_0005_61F65AAXX_s_1	100510_HWUSI-EAS1671_0006_61F2HAAXX_s_1	100510_HWUSI-EAS1671_0006_61F2HAAXX_s_2	100521_HWUSI-EAS1671_0007_61RJGAAXX_s_5	101209_HWUSI-EAS1671_00020_FC_62LBMAAXX_s_3
Human	4	1	26511620	39945034	11	1	23500148	44071337	10	1	19847360	37420687	10	0.47619	21826038	41977536	34704310	39945034	26511620	31053821	32775703	31958277	30819940	29800386	23500148	31643912	30133117	44071337	32758227	35356752	30546458	26064909	29687117	30865473	19847360	29491709	28059247	30529745	26291006	36638437	37420687	26702901	25168002	22811005	27421247	24705240	27923278	21826038	30094878
MuLV	4	1	0.0754386	0.772852	11	1	0.0625816	0.298675	10	1	0.0339078	0.160339	10	0.47619	0.0374491	0.255277	0.172889	0.175241	0.0754386	0.772852	0.122042	0.0625816	0.162233	0.167783	0.170212	0.126407	0.298675	0.249595	0.122107	0.113133	0.130948	0.115097	0.101054	0.0647973	0.151154	0.0339078	0.0356389	0.0982648	0.0760716	0.0545875	0.160339	0.0374491	0.238398	0.087677	0.255277	0.0809545	0.107437	0.0458168	0.0664565
Cytomegalovisus	0	0	0	0	1	0.0909091	0.796466	0.796466	0	0	0	0	2	0.0952381	0.0714668	0.137451	0	0	0	0	0	0	0	0	0	0	0.796466	0	0	0	0	0	0	0	0	0	0	0	0	0	0	0	0	0	0	0	0	0.137451	0
Roseolovirus	0	0	0	0	0	0	0	0	0	0	0	0	1	0.047619	0.0438385	0.0438385	0	0	0	0	0	0	0	0	0	0	0	0	0	0	0	0	0	0	0	0	0	0	0	0	0	0	0	0.0438385	0	0	0	0	0
Herpesvirus 7	0	0	0	0	0	0	0	0	2	0.2	0.0327549	0.0356389	0	0	0	0	0	0	0	0	0	0	0	0	0	0	0	0	0	0	0	0	0	0	0	0	0.0356389	0.0327549	0	0	0	0	0	0	0	0	0	0	0
Adenovirus C	0	0	0	0	2	0.181818	0.0324465	0.0671132	10	1	0.0534464	0.345292	10	0.47619	0.0476445	1.04858	0	0	0	0	0	0	0.0324465	0.0671132	0	0	0	0	0	0	0	0.345292	0.235793	0.129595	0.201538	0.305171	0.249472	0.0655099	0.0760716	0.136469	0.0534464	1.04858	0.119199	0.087677	0.328213	0.323818	0.0716248	0.366535	0.0996847
Mouse mammary tumor virus	1	0.25	0.0250344	0.0250344	4	0.363636	0.0282831	0.045381	0	0	0	0	0	0	0	0	0	0.0250344	0	0	0	0	0.0324465	0.0335566	0		0	0.045381	0	0.0282831	0	0	0	0	0	0	0	0	0	0	0	0	0	0	0	0	0	0	0
Simbu virus	3	0.75	0.0250344	0.225415	5	0.454545	0.0305104	0.197982	0	0	0	0	0	0	0	0	0	0.0250344	0.0377193	0.225415	0.0305104	0	0	0	0	0.0316017	0	0	0.0610534	0.197982	0.0982111	0	0	0	0	0	0	0	0	0	0	0	0	0	0	0	0	0	0
Human immunodeficiency virus 1	0	0	0	0	1	0.0909091	0.0316017	0.0316017	0	0	0	0	0	0	0	0	0	0	0	0	0	0	0	0	0	0.0316017	0	0	0	0	0	0	0	0	0	0	0	0	0	0	0	0	0	0	0	0	0	0	0
Hepatitis C virus genotype 1	0	0	0	0	1	0.0909091	0.0305104	0.0305104	0	0	0	0	0	0	0	0	0	0	0	0	0.0305104	0	0	0	0	0	0	0	0	0	0	0	0	0	0	0	0	0	0	0	0	0	0	0	0	0	0	0	0
Hepatitis C virus genotype 2	0	0	0	0	1	0.0909091	0.0425529	0.0425529	0	0	0	0	0	0	0	0	0	0	0	0	0	0	0	0	0.0425529	0	0	0	0	0	0	0	0	0	0	0	0	0	0	0	0	0	0	0	0	0	0	0	0
Simian virus 40	0	0	0	0	0	0	0	0	1	0.1	0.0267232	0.0267232	0	0	0	0	0	0	0	0	0	0	0	0	0	0	0	0	0	0	0	0	0	0	0	0	0	0	0	0	0.0267232	0	0	0	0	0	0	0	0
Papillomavirus 16	0	0	0	0	0	0	0	0	1	0.1	0.0383658	0.0383658	0	0	0	0	0	0	0	0	0	0	0	0	0	0	0	0	0	0	0	0.0383658			0	0	0	0	0	0	0	0	0	0	0	0	0	0	0
Papillomavirus 110	0	0	0	0	1	0.0909091	0.0226905	0.0226905	0	0	0	0	0	0	0	0	0	0	0	0	0	0	0		0		0	0.0226905	0	0	0	0	0	0	0	0	0	0	0	0	0	0	0	0	0	0	0	0	0
Shamonda virus	4	1	5.40743	15.4892	11	1	0.0312908	15.98	10	1	0.345292	6.27995	10	0.47619	1.42307	11.1735	6.51216	5.40743	9.20351	15.4892	1.09837	0.0312908	0.162233	0.20134	0.170212	0.126407	0	0.4765	6.80745	15.98	13.5531	0.345292	5.45691	2.10591	1.46115	3.8994	1.35428	2.71866	1.52143	1.55574	6.27995	1.42307	6.99301	4.5592	3.46447	3.40009	11.1735	3.66535	4.21999
Moloney murine leukemia virus	1	0.25	0.0322022	0.0322022	1	0.0909091	0.0226905	0.0226905	0	0	0	0	0	0	0	0	0	0	0	0.0322022	0	0	0	0	0	0	0	0.0226905	0	0	0	0	0	0	0	0	0	0	0	0	0	0	0	0	0	0	0	0	0
Abelson murine leukemia virus	3	0.75	0.0322022	0.100138	4	0.363636	0.0305104	0.0907619	10	1	0.0339078	0.160339	10	0.47619	0.0374491	0.255277	0.0576297	0.100138	0	0.0322022	0.0305104	0	0	0	0	0.0316017	0.0331861	0.0907619	0	0	0	0.115097	0.101054	0.0647973	0.151154	0.0339078	0.0356389	0.0982648	0.0760716	0.0545875	0.160339	0.0374491	0.238398	0.087677	0.255277	0.0809545	0.107437	0.0458168	0.0664565
[truncated: 2 more columns]
