# Supplementary material for: Assessment of viral RNA in idiopathic pulmonary fibrosis using RNA-seq
Source: BMC Pulm Med. 2020 Apr 3;20:81. doi: 10.1186/s12890-020-1114-1 (PMC7119082; doi:10.1186/s12890-020-1114-1)
Supplement: Supplementary file 2 — Additional file 2: Table S2. Counts for human and HERV-K & HERV-W mapped RNA-seq reads for IPF and control lung RNA. Virus-encoded genes are shown if at least one read was detected in at least one sample. [file 12890_2020_1114_MOESM2_ESM.xlsx]

## Sheet: Sheet1
	Initial Cohort								Second Cohort								Initial Cohort															Second Cohort
	Control				IPF				Control (Carcinoma)				IPF				Control				IPF											Control (Carcinoma)										IPF
	# of samples	% of samples	Min	Max	# of samples	% of samples	Min	Max	# of samples	% of samples	Min	Max	# of samples	% of samples	Min	Max	3013	3014	3017	3018	2005	2019	2024	2025	2032	2041	2042	2044	2048	2049	2051	100325 HWUSI-EAS1671 0002 616HEAAXX s 1	100409 HWUSI-EAS1671 0004 6177TAAXX s 5	100423 HWUSI-EAS1671 0005 61F65AAXX s 7	100423 HWUSI-EAS1671 0005 61F65AAXX s 8	100521 HWUSI-EAS1671 0007 61RJGAAXX s 7	100608 HWUSI-EAS1671 0001 61RL4AAXX s 6	100608 HWUSI-EAS1671 0001 61RL4AAXX s 7	100608 HWUSI-EAS1671 0001 61RL4AAXX s 8	101115 HWUSI-EAS1671 0017 62LBNAAXX s 3	110118 HWUSI-EAS1671 0022 6159RAAXX s 3	100325 HWUSI-EAS1671 0002 616HEAAXX s 3	100409 HWUSI-EAS1671 0004 6177TAAXX s 7	100409 HWUSI-EAS1671 0004 6177TAAXX s 8	100423 HWUSI-EAS1671 0005 61F65AAXX s 1	100510 HWUSI-EAS1671 0006 61F2HAAXX s 1	100510 HWUSI-EAS1671 0006 61F2HAAXX s 2	100521 HWUSI-EAS1671 0007 61RJGAAXX s 5	101209 HWUSI-EAS1671 00020 FC 62LBMAAXX s 3
Human	4	1	26511620	39945034	11	1	23500148	44071337	10	1	19847360	37420687	10	1	21826038	41977536	34704310	39945034	26511620	31053821	32775703	31958277	30819940	29800386	23500148	31643912	30133117	44071337	32758227	35356752	30546458	26064909	29687117	30865473	19847360	29491709	28059247	30529745	26291006	36638437	37420687	26702901	25168002	22811005	27421247	24705240	27923278	21826038	30094878
HERVs	4	1	27.4127	38.7848	11	1	34.3411	83.5864	10	1	38.1739	86.0064	10	1	38.8069	98.2597	38.7848	27.4127	30.1754	35.1004	63.4311	67.9949	60.2856	53.3886	53.6167	83.5864	62.9872	44.0422	37.212	37.3903	34.3411	38.1739	50.2912	53.9762	86.0064	63.5094	53.9573	53.063	66.7909	52.868	83.2694	59.4317	98.2597	70.6676	68.1224	85.0022	75.3135	38.8069	47.3835
HERV-K	4	1	23.7576	34.6067	11	1	32.3442	80.5842	10	1	37.1381	83.0841	10	1	37.02	95.4386	34.6067	23.7576	26.2526	32.814	60.1665	66.1175	57.2032	50.9725	51.489	80.5842	60.6642	42.3178	35.9604	35.3822	32.3442	37.1381	48.4048	51.7083	83.0841	59.6439	51.9971	48.8704	64.4707	49.7292	80.9178	57.372	95.4386	66.8975	65.0226	81.3188	72.0546	37.02	45.3233
HERV-W	4	1	0.0500688	0.489853	11	1	0.0565663	1.01125	10	1	0.190179	0.507741	10	1	0.174142	0.701416	0.489853	0.0500688	0.150877	0.161011	0.488166	0.531944	0.519144	0.469793	0.340423	1.01125	0.76328	0.544572	0.0610534	0.0565663	0.0982111	0.345292	0.370531	0.291588	0.403076	0.372986	0.32075	0.327549	0.190179	0.409406	0.507741	0.337042	0.317864	0.701416	0.401149	0.283341	0.465561	0.503985	0.232598
HERV W envC7-1env	1	0.25	0.0576297	0.0576297	6	0.545455	0.0282831	0.0907619	1	0.1	0.0336846	0.0336846	3	0.3	0.0374491	0.0716248	0.0576297	0	0	0	0	0.0312908	0.0648931	0	0.0425529	0	0.0331861	0.0907619	0	0.0282831	0	0	0.0336846	0	0	0	0	0	0	0	0	0.0374491	0	0	0	0.0404772	0.0716248	0	0
HERV W proC6-19 pro	0	0	0	0	4	0.363636	0.0324465	0.094805	2	0.2	0.0534464	0.0673693	0	0	0	0	0	0	0	0	0	0	0.0324465	0.0335566	0	0.094805	0.0331861	0	0	0	0	0	0.0673693	0	0	0	0	0	0	0	0.0534464	0	0	0	0	0	0	0	0
HERV W gagC3.37 gag	0	0	0	0	5	0.454545	0.0282831	0.0663722	2	0.2	0.0339078	0.0380358	4	0.4	0.0332282	0.079466	0	0	0	0	0	0.0625816	0.0648931	0	0	0.0316017	0.0663722	0	0	0.0282831	0	0	0	0	0	0.0339078	0	0	0.0380358	0	0	0	0.079466	0	0	0	0.0358124	0	0.0332282
HERV W 3LTR partial	0	0	0	0	1	0.0909091	0.0305267	0.0305267	0	0	0	0	0	0	0	0	0	0	0	0	0	0	0	0	0	0	0	0	0.0305267	0	0	0	0	0	0	0	0	0	0	0	0	0	0	0	0	0	0	0	0
HERV W env isolate W-X-3	1	0.25	0.0377193	0.0377193	5	0.454545	0.0305104	0.094805	6	0.6	0.0356389	0.191056	7	0.7	0.0238223	0.229084	0	0	0.0377193	0	0.0305104	0.0312908	0.0324465	0	0	0.094805	0.0663722	0	0	0	0	0.0767315	0	0	0	0.0678157	0.0356389	0.0982648	0	0.191056	0.0534464	0.0374491	0	0.087677	0	0.0809545	0.107437	0.229084	0
HERV W polyprotein clone HWX5	0	0	0	0	1	0.0909091	0.0425529	0.0425529	0	0	0	0	0	0	0	0	0	0	0	0	0	0	0	0	0.0425529	0	0	0	0	0	0	0	0	0	0	0	0	0	0	0	0	0	0	0	0	0	0	0	0
HERV W clone HWX3	0	0	0	0	1	0.0909091	0.0226905	0.0226905	0	0	0	0	0	0	0	0	0	0	0	0	0	0	0	0	0	0	0	0.0226905	0	0	0	0	0	0	0	0	0	0	0	0	0	0	0	0	0	0	0	0	0
HERV W env isolate W-20-9	0	0	0	0	0	0	0	0	0	0	0	0	1	0.1	0.0458168	0.0458168	0	0	0	0	0	0	0	0	0	0	0	0	0	0	0	0	0	0	0	0	0	0	0	0	0	0	0	0	0	0	0	0.0458168	0
HERV W env isolate W-17-5	0	0	0	0	1	0.0909091	0.0425529	0.0425529	0	0	0	0	1	0.1	0.0238223	0.0238223	0	0	0	0	0	0	0	0	0.0425529	0	0	0	0	0	0	0	0	0	0	0	0	0	0	0	0	0	0	0	0	0	0	0	0
HERV W env isolate W-14-1	2	0.5	0.0322022	0.0377193	6	0.545455	0.0305267	0.126407	5	0.5	0.0272937	0.0767315	6	0.6	0.0290237	0.0476445	0	0	0.0377193	0.0322022	0	0.0625816	0.0648931	0.0335566	0	0.126407	0	0.045381	0.0305267	0	0	0.0767315	0	0.0323987	0	0	0	0	0.0760716	0.0272937	0.0534464	0	0.039733	0	0.0364681	0	0.0358124	0	0.0332282
HERV W env isolate W-4-1	0	0	0	0	2	0.181818	0.0226905	0.0305104	0	0	0	0	0	0	0	0	0	0	0	0	0.0305104	0	0	0	0	0	0	0.0226905	0	0	0	0	0	0	0	0	0	0	0	0	0	0	0	0	0	0	0	0	0
HERV W isolate W-1-1	0	0	0	0	2	0.181818	0.0312908	0.0331861	0	0	0	0	0	0	0	0	0	0	0	0	0	0.0312908	0	0	0	0	0.0331861	0	0	0	0	0	0	0	0	0	0	0	0	0	0	0	0	0	0	0	0	0	0
HERV MSRV pV14 env	4	1	0.150206	0.905263	11	1	0.229159	0.793271	10	1	0.230195	2.35836	10	1	0.404979	2.02386	0.576297	0.150206	0.905263	0.257617	0.793271	0.344199	0.648931	0.335566	0.340423	0.632033	0.597349	0.363048	0.335794	0.424247	0.229159	0.230195	0.572639	0.939561	1.41077	1.39022	0.748416	2.35836	0.798752	1.47386	0.481017	1.01113	0.834393	1.22748	1.09404	2.02386	1.18181	0.962154	0.996847
HERV MSRV gag	0	0	0	0	4	0.363636	0.0305267	0.0973396	1	0.1	0.0380358	0.0380358	3	0.3	0.0290237	0.0438385	0	0	0	0	0	0.0312908	0.0973396	0	0	0	0.0331861	0	0.0305267	0	0	0	0	0	0	0	0	0	0.0380358	0	0	0	0	0.0438385	0	0	0	0	0.0332282
HERV MSRV clone CL6 pol-env LTR	0	0	0	0	3	0.272727	0.0282831	0.0324465	0	0	0	0	1	0.1	0.0404772	0.0404772	0	0	0	0	0	0	0.0324465	0	0	0	0	0	0.0305267	0.0282831	0	0	0	0	0	0	0	0	0	0	0	0	0	0	0	0.0404772	0	0	0
HERV MSRV clone CL15 env	4	1	0.0322022	0.259334	11	1	0.032737	0.457656	10	1	0.0383658	0.440802	10	1	0.0916337	0.537186	0.259334	0.0751032	0.150877	0.0322022	0.457656	0.312908	0.194679	0.0671132	0.0425529	0.158008	0.16593	0.204214	0.18316	0.197982	0.032737	0.0383658	0.168423	0.129595	0.201538	0.440802	0.178194	0.425814	0.114107	0.354819	0.347401	0.299593	0.278131	0.350708	0.437617	0.242863	0.537186	0.0916337	0.232598
HERV W ERVW-1	4	1	0.0250344	0.316964	9	0.818182	0.065474	0.537228	10	1	0.0760716	0.267232	10	1	0.0809545	0.350708	0.316964	0.0250344	0.0377193	0.0966065	0.305104	0.312908	0.259572	0.234896	0.212765	0.537228	0.298675	0.249595	0	0	0.065474	0.191829	0.168423	0.161993	0.251923	0.203447	0.178194	0.163775	0.0760716	0.136469	0.267232	0.224695	0.158932	0.350708	0.291745	0.0809545	0.179062	0.137451	0.132913
HERV W ERVW-1 variant	1	0.25	0.115259	0.115259	6	0.545455	0.0305104	0.16593	8	0.8	0.0545875	0.151154	9	0.9	0.0290237	0.131515	0.115259	0	0	0	0.0305104	0	0	0.0671132	0	0.0632033	0.16593	0.0680715	0	0	0.032737	0	0.101054	0.0647973	0.151154	0.0678157	0.106917	0.0655099	0	0.0545875	0.0801696	0.0374491	0.039733	0.131515	0.0364681	0.0809545	0.0358124	0.0916337	0
HERV W isolate 5 LTR	0	0	0	0	1	0.0909091	0.0335566	0.0335566	0	0	0	0	0	0	0	0	0	0	0	0	0	0	0	0.0335566	0	0	0	0	0	0	0	0	0	0	0	0	0	0	0	0	0	0	0	0	0	0	0	0	0
HERV W isolate 4 LTR	0	0	0	0	1	0.0909091	0.0305104	0.0305104	0	0	0	0	1	0.1	0.0438385	0.0438385	0	0	0	0	0.0305104	0	0	0	0	0	0	0	0	0	0	0	0	0	0	0	0	0	0	0	0	0	0	0.0438385	0	0	0	0	0
HERV MSRV clone CL4 env	0	0	0	0	1	0.0909091	0.032737	0.032737	1	0.1	0.0327549	0.0327549	2	0.2	0.0332282	0.0364681	0	0	0	0	0	0	0	0	0	0	0	0	0	0	0.032737	0	0	0	0	0	0	0.0327549	0	0	0	0	0	0	0.0364681	0	0	0	0.0332282
HERV W gag isolate HWG1-1	0	0	0	0	0	0	0	0	0	0	0	0	2	0.2	0.0332282	0.0364681	0	0	0	0	0	0	0	0	0	0	0	0	0	0	0	0	0	0	0	0	0	0	0	0	0	0	0	0	0.0364681	0	0	0	0.0332282
HERV W gag isolate HWG1-3	0	0	0	0	4	0.363636	0.0226905	0.0331861	0	0	0	0	1	0.1	0.0438385	0.0438385	0	0	0	0	0.0305104	0	0	0	0	0.0316017	0.0331861	0.0226905	0	0	0	0	0	0	0	0	0	0	0	0	0	0	0	0.0438385	0	0	0	0	0
HERV W gag isolate HWG1-5	1	0.25	0.0250344	0.0250344	0	0	0	0	1	0.1	0.0323987	0.0323987	0	0	0	0	0	0.0250344	0	0	0	0	0	0	0	0	0	0	0	0	0	0	0	0.0323987	0	0	0	0	0	0	0	0	0	0	0	0	0	0	0
HERV W gag isolate HWG3-3	0	0	0	0	1	0.0909091	0.0316017	0.0316017	0	0	0	0	0	0	0	0	0	0	0	0	0	0	0	0	0	0.0316017	0	0	0	0	0	0	0	0	0	0	0	0	0	0	0	0	0	0	0	0	0	0	0
HERV W gag isolate HWG3-8	1	0.25	0.0322022	0.0322022	2	0.181818	0.0305104	0.0335566	0	0	0	0	0	0	0	0	0	0	0	0.0322022	0.0305104	0	0	0.0335566	0	0	0	0	0	0	0	0	0	0	0	0	0	0	0	0	0	0	0	0	0	0	0	0	0
HERV W gag isolate HWG8-1	0	0	0	0	1	0.0909091	0.0226905	0.0226905	0	0	0	0	0	0	0	0	0	0	0	0	0	0	0	0	0	0	0	0.0226905	0	0	0	0	0	0	0	0	0	0	0	0	0	0	0	0	0	0	0	0	0
HERV W gag isolate HWG8-6	1	0.25	0.0377193	0.0377193	2	0.181818	0.0331861	0.0335566	0	0	0	0	2	0.2	0.0238223	0.0438385	0	0	0.0377193	0	0	0	0	0.0335566	0	0	0.0331861	0	0	0	0	0	0	0	0	0	0	0	0	0	0	0	0	0.0438385	0	0	0	0	0
HERV K50D	4	1	0.0751032	0.226316	11	1	0.170212	0.563234	10	1	0.0380358	0.352692	10	1	0.0748982	0.556262	0.172889	0.0751032	0.226316	0.128809	0.244083	0.563234	0.421805	0.436236	0.170212	0.410822	0.398233	0.204214	0.213687	0.226265	0.229159	0.0767315	0.168423	0.323987	0.352692	0.237355	0.249472	0.163775	0.0380358	0.0818812	0.213785	0.0748982	0.556262	0.263031	0.364681	0.242863	0.286499	0.137451	0.132913
HERV K50F	4	1	0.128809	0.425585	11	1	0.197982	1.51688	10	1	0.26856	0.818874	10	1	0.366535	1.47012	0.403408	0.425585	0.377193	0.128809	0.640719	1.28292	0.811163	0.570462	0.851058	1.51688	1.02877	0.816857	0.702114	0.197982	0.589266	0.26856	0.404216	0.615575	0.705383	0.745972	0.356389	0.818874	0.45643	0.463994	0.427571	0.86133	1.47012	0.701416	0.838766	0.607159	1.03856	0.366535	0.731021
HERV K50E	0	0	0	0	1	0.0909091	0.0324465	0.0324465	0	0	0	0	2	0.2	0.0729361	0.079466	0	0	0	0	0	0	0.0324465	0	0	0	0	0	0	0	0	0	0	0	0	0	0	0	0	0	0	0	0.079466	0	0.0729361	0	0	0	0
HERV K50B	4	1	0.264035	0.386426	11	1	0.244213	1.20086	10	1	0.383658	0.988758	10	1	0.437617	1.31119	0.288149	0.300413	0.264035	0.386426	0.73225	0.938724	0.486698	0.436236	0.595741	1.20086	0.962396	0.544572	0.244213	0.53738	0.294633	0.383658	0.404216	0.421183	0.604614	0.881604	0.392028	0.393059	0.836788	0.65505	0.988758	0.636635	1.31119	0.5699	0.437617	0.485727	0.787873	0.778886	0.465195
HERV K50A	4	1	0.575791	1.15928	11	1	0.838915	2.25294	10	1	1.53463	3.52692	10	1	1.14542	3.7349	0.691557	0.575791	0.754386	1.15928	1.98318	2.25294	1.71967	0.838915	1.4468	2.14891	1.79205	0.998381	0.885274	1.41416	1.27674	1.53463	1.61686	2.91588	3.52692	2.06838	1.71067	3.04621	1.63554	2.26538	2.59215	2.50909	3.7349	2.8495	2.73511	2.18577	2.29199	1.14542	2.22629
HERV K12	3	0.75	0.0250344	0.0377193	4	0.363636	0.032737	0.199116	8	0.8	0.0356389	0.201538	7	0.7	0.0332282	0.119199	0	0.0250344	0.0377193	0.0322022	0	0.125163	0	0	0.0851058	0	0.199116	0	0	0	0.032737	0	0.168423	0.0647973	0.201538	0	0.0356389	0.0655099	0.0380358	0.109175	0.106893	0	0.119199	0.087677	0.0364681	0	0.0716248	0	0.0332282
HERV K41	4	1	0.226316	0.418628	11	1	0.424247	1.45368	10	1	0.230195	1.15884	10	1	0.364295	1.28925	0.288149	0.350482	0.226316	0.418628	0.884802	1.15776	0.584037	1.04025	0.638294	1.45368	0.829652	0.658024	0.763167	0.424247	0.523792	0.230195	0.404216	0.712771	1.15884	0.745972	0.498944	0.818874	0.380358	0.382112	0.721526	0.636635	0.715194	0.394546	0.875234	0.364295	1.28925	0.595619	0.963619
HERV KOLD130352	4	1	0.175241	0.230519	11	1	0.163685	1.46019	10	1	0.202108	1.10155	10	1	0.166141	1.32506	0.230519	0.175241	0.188597	0.225415	1.31195	0.876142	0.778717	0.872472	1.19148	1.16926	1.46019	1.17991	0.335794	0.226265	0.163685	0.383658	0.202108	1.10155	0.403076	0.305171	0.570222	0.229285	0.760716	0.409406	0.908588	0.561737	0.357597	0.526062	0.255277	0.971454	1.32506	0.274901	0.166141
HERV K77	4	1	0.0322022	0.201704	11	1	0.0848494	0.474025	10	1	0.0323987	0.374125	10	1	0.0404772	0.322312	0.201704	0.125172	0.0754386	0.0322022	0.244083	0.187745	0.259572	0.20134	0.212765	0.474025	0.16593	0.226905	0.122107	0.0848494	0.0982111	0.0383658	0.202108	0.0323987	0.0503845	0.169539	0.0356389	0.0655099	0.114107	0.191056	0.374125	0.112347	0.238398	0.131515	0.291745	0.0404772	0.322312	0.0916337	0.132913
HERV K7	4	1	0.288149	0.452632	11	1	0.298675	1.8961	10	1	0.191829	1.28271	10	1	0.0916337	2.79293	0.288149	0.375516	0.452632	0.322022	0.518677	0.312908	1.36275	0.738245	0.468082	1.8961	0.298675	0.499191	0.488427	0.565663	0.622003	0.191829	0.370531	0.356385	0.705383	0.508618	0.712778	0.425814	0.45643	0.682344	1.28271	1.42307	2.50318	0.219192	2.69864	2.79293	0.823686	0.0916337	0.996847
HERV K50C	4	1	0.188597	0.576297	11	1	0.523792	2.59134	10	1	0.352692	1.68423	10	1	0.465195	1.93281	0.576297	0.425585	0.188597	0.483032	0.976333	0.78227	1.36275	0.637576	1.27659	2.59134	1.36063	0.612643	0.793694	0.933344	0.523792	0.422023	1.68423	0.550777	0.352692	0.610341	0.356389	0.622344	0.874824	0.518581	1.30944	1.31072	1.90718	1.09596	1.93281	0.769068	1.18181	0.549802	0.465195
HERV K17B	4	1	0.225415	0.716667	11	1	0.335794	1.10606	10	1	0.45643	11.8116	10	1	0.366535	16.3528	0.489853	0.40055	0.716667	0.225415	0.579698	0.657107	0.940949	0.436236	0.765953	1.10606	0.564163	0.998381	0.335794	0.791928	0.556529	0.575486	0.640008	0.583176	0.503845	0.712065	1.06917	1.21193	0.45643	0.764225	11.8116	0.674084	1.19199	1.62202	1.8234	16.3528	1.18181	0.366535	0.598108
HERV K17A	4	1	0.188597	0.325447	11	1	0.32737	3.03376	10	1	0.383658	1.78194	10	1	0.636635	2.0055	0.259334	0.325447	0.188597	0.193213	1.80011	1.25163	2.10902	0.805359	1.27659	3.03376	2.78763	2.35981	0.518954	0.509097	0.32737	0.383658	1.07791	1.74953	1.00769	0.881604	1.78194	0.753364	0.45643	0.791518	1.1491	0.636635	1.70852	1.49051	0.984638	1.29527	2.0055	0.778886	0.731021
HERV KOLD35587	3	0.75	0.0250344	0.115259	8	0.727273	0.0324465	0.197982	9	0.9	0.0545875	0.305171	10	1	0.0664565	0.437063	0.115259	0.0250344	0.0377193	0	0.183062	0	0.0324465	0.134226	0.0851058	0.158008	0.0995582	0.136143	0	0.197982	0	0.153463	0.0673693	0.0647973	0.100769	0.305171	0.142556	0.0982648	0	0.0545875	0.106893	0.112347	0.437063	0.219192	0.0729361	0.121432	0.214874	0.183267	0.0664565
HERV K76	0	0	0	0	2	0.181818	0.0226905	0.0331861	2	0.2	0.0323987	0.0503845	1	0.1	0.039733	0.039733	0	0	0	0	0	0	0	0	0	0	0.0331861	0.0226905	0	0	0	0	0	0.0323987	0.0503845	0	0	0	0	0	0	0	0.039733	0	0	0	0	0	0
HERV K6	0	0	0	0	1	0.0909091	0.0331861	0.0331861	0	0	0	0	1	0.1	0.079466	0.079466	0	0	0	0	0	0	0	0	0	0	0.0331861	0	0	0	0	0	0	0	0	0	0	0	0	0	0	0	0.079466	0	0	0	0	0	0
HERV KOLD345	4	1	0.754386	3.83206	11	1	0.261896	9.95047	10	1	0.163775	1.08505	10	1	0.229084	3.65544	0.922076	1.15158	0.754386	3.83206	1.22042	9.95047	1.42765	1.07381	0.851058	3.09696	1.46019	0.589953	1.19054	0.735362	0.261896	0.767315	0.741062	0.226791	0.604614	1.08505	0.427667	0.163775	0.874824	0.545875	0.908588	1.34817	3.65544	2.14809	2.04221	1.37623	1.61156	0.229084	0.431967
HERV K27	4	1	0.0644043	0.259334	11	1	0.197982	1.39382	10	1	0.115097	0.646609	10	1	0.166141	0.874126	0.259334	0.125172	0.113158	0.0644043	1.31195	0.938724	0.973396	0.570462	0.808506	1.35887	1.39382	1.04376	0.335794	0.197982	0.261896	0.115097	0.235793	0.388784	0.352692	0.440802	0.427667	0.360304	0.646609	0.272937	0.507741	0.486838	0.874126	0.701416	0.291745	0.607159	0.752061	0.229084	0.166141
HERV K29	4	1	0.175241	0.259334	11	1	0.169699	0.979651	10	1	0.0380358	0.425814	9	0.9	0.087071	0.838766	0.259334	0.175241	0.188597	0.257617	0.335614	0.469362	0.519144	0.268453	0.680847	0.979651	0.464605	0.431119	0.36632	0.169699	0.261896	0.0383658	0.134739	0.129595	0.352692	0.237355	0.249472	0.425814	0.0380358	0.109175	0.187062	0.486838	0.715194	0.350708	0.838766	0.404772	0.179062	0	0.531652
HERV K63	2	0.5	0.0288149	0.0644043	8	0.727273	0.0312908	0.0648931	6	0.6	0.0323987	0.13102	7	0.7	0.0290237	0.131515	0.0288149	0	0	0.0644043	0.0610208	0.0312908	0.0648931	0.0335566	0	0.0316017	0.0331861	0.045381	0	0.0565663	0	0	0.0336846	0.0323987	0	0.0339078	0	0.13102	0.0380358	0.0818812	0	0	0.079466	0.131515	0.109404	0.0809545	0.107437	0	0
HERV K31	4	1	0.0288149	0.188597	11	1	0.163685	1.67489	10	1	0.13102	0.572639	10	1	0.232189	2.06612	0.0288149	0.100138	0.188597	0.0322022	0.671229	0.813561	0.876056	0.536906	0.425529	1.67489	0.730094	0.839548	0.213687	0.282831	0.163685	0.191829	0.572639	0.291588	0.453461	0.406894	0.285111	0.13102	0.228215	0.354819	0.481017	0.86133	2.06612	0.306869	0.692893	0.647636	0.931123	0.320718	0.531652
HERV K18b	3	0.75	0.0322022	0.0864446	10	0.909091	0.045381	0.250326	8	0.8	0.0545875	0.161993	10	1	0.0374491	0.39733	0.0864446	0.0751032	0	0.0322022	0.0610208	0.250326	0.0973396	0.20134	0	0.126407	0.0663722	0.045381	0.09158	0.113133	0.0982111	0	0.0673693	0.161993	0	0.0678157	0.142556	0.0982648	0.0760716	0.0545875	0.106893	0.0374491	0.39733	0.087677	0.218808	0.0809545	0.322312	0.0458168	0.132913
HERV-K70	0	0	0	0	4	0.363636	0.0324465	0.0632033	2	0.2	0.0323987	0.151154	4	0.4	0.0358124	0.119199	0	0	0	0	0	0	0.0324465	0.0335566	0.0425529	0.0632033	0	0	0	0	0	0	0	0.0323987	0.151154	0	0	0	0	0	0	0	0.119199	0.087677	0	0	0.0358124	0	0
HERV K42	4	1	0.483032	1.1693	11	1	0.793694	6.17261	10	1	0.798752	2.6109	10	1	1.32869	3.01971	0.950891	0.62586	1.1693	0.483032	3.32563	3.47328	1.68722	2.5503	2.80849	5.40388	6.17261	2.97245	0.793694	0.820211	1.01485	1.07424	1.7516	1.06916	1.91461	2.6109	1.283	1.27744	0.798752	1.03716	2.1913	1.83501	3.01971	2.41112	2.00574	1.74052	2.11293	1.32869	1.66141
HERV K23	2	0.5	0.0322022	0.0377193	8	0.727273	0.0282831	0.170212	4	0.4	0.0323987	0.0712778	7	0.7	0.0290237	0.131515	0	0	0.0377193	0.0322022	0	0	0.129786	0.134226	0.170212	0.094805	0.0331861	0.0680715	0.0610534	0.0282831	0	0	0.0673693	0.0323987	0	0.0339078	0.0712778	0	0	0	0	0	0.119199	0.131515	0.0364681	0.0809545	0.0358124	0	0
HERV K71	4	1	0.150206	0.386426	11	1	0.0982111	0.979651	10	1	0.0383658	0.327525	10	1	0.0458168	0.607159	0.345778	0.150206	0.226316	0.386426	0.427146	0.500653	0.356912	0.167783	0.808506	0.979651	0.232303	0.589953	0.244213	0.226265	0.0982111	0.0383658	0.235793	0.0647973	0.0503845	0.101724	0.285111	0.19653	0.152143	0.327525	0.293955	0.262144	0.437063	0.263031	0.255277	0.607159	0.572999	0.0458168	0.199369
HERV K60	4	1	0.0377193	0.0751032	11	1	0.113452	0.536906	10	1	0.0655099	0.403076	10	1	0.0332282	0.516529	0.0576297	0.0751032	0.0377193	0.0644043	0.305104	0.469362	0.324465	0.536906	0.340423	0.284415	0.132744	0.113452	0.18316	0.169699	0.261896	0.153463	0.168423	0.161993	0.403076	0.271263	0.106917	0.0655099	0.114107	0.163762	0.293955	0.112347	0.516529	0.175354	0.510553	0.161909	0.250687	0.0916337	0.0332282
HERV K20	1	0.25	0.0288149	0.0288149	6	0.545455	0.0305104	0.065474	6	0.6	0.0323987	0.0801696	5	0.5	0.0290237	0.107437	0.0288149	0	0	0	0.0305104	0.0312908	0	0	0.0425529	0.0316017	0.0331861	0	0	0	0.065474	0	0.0336846	0.0323987	0.0503845	0	0	0.0327549	0	0.0545875	0.0801696	0	0.079466	0.0438385	0	0.0404772	0.107437	0	0
HERV K30	2	0.5	0.0288149	0.0377193	6	0.545455	0.0305267	0.152552	8	0.8	0.0323987	0.106893	7	0.7	0.0290237	0.132913	0.0288149	0	0.0377193	0	0.152552	0.0312908	0	0	0	0.0632033	0.0331861	0	0.0305267	0.0565663	0	0	0.0336846	0.0323987	0.100769	0.101724	0.0712778	0.0982648	0.0380358	0	0.106893	0.0374491	0.079466	0.0438385	0.109404	0	0.107437	0	0.132913
HERV K59	4	1	0.250344	0.979705	11	1	0.424247	1.75228	10	1	0.4379	4.10514	10	1	0.608811	1.42881	0.979705	0.250344	0.603509	0.515235	0.76276	1.75228	0.713824	0.771802	1.02127	0.442423	1.39382	0.794167	0.64106	0.424247	1.53864	4.10514	0.4379	0.842365	1.51154	0.915512	0.96225	0.917138	1.36929	1.00987	1.09565	0.674084	1.07279	1.05212	1.05757	0.890499	0.608811	0.641436	1.42881
HERV K52	0	0	0	0	9	0.818182	0.0282831	1.07074	3	0.3	0.0323987	0.0673693	6	0.6	0.039733	0.087677	0	0	0	0	0.0915312	0.0938724	1.07074	0.10067	0.127659	0.221212	0	0	0.0610534	0.0282831	0.032737	0	0.0673693	0.0323987	0	0	0	0.0327549	0	0	0	0	0.039733	0.087677	0.0729361	0.0404772	0.0716248	0	0
HERV K69	2	0.5	0.0288149	0.0644043	8	0.727273	0.0282831	0.18961	2	0.2	0.0267232	0.101724	4	0.4	0.0290237	0.119199	0.0288149	0	0	0.0644043	0.0915312	0.0625816	0.0973396	0	0.0425529	0.18961	0.132744	0	0	0.0282831	0.032737	0	0	0	0	0.101724	0	0	0	0	0.0267232	0	0.119199	0	0	0	0.0716248	0	0.0332282
HERV KOLD12309	4	1	0.354224	1.3579	11	1	0.848494	3.0665	10	1	0.652218	2.56961	10	1	1.14542	2.90051	1.23904	0.976342	1.3579	0.354224	2.10522	3.0665	1.49254	1.61072	1.57446	2.71774	2.45577	2.70017	1.70949	0.848494	2.0297	0.652218	1.11159	1.84672	2.56961	1.96665	1.35428	1.83428	1.29322	1.63762	1.87062	1.49796	2.90051	1.66586	2.80804	1.98338	2.79337	1.14542	1.2959
HERV K36	4	1	0.188597	0.316964	11	1	0.130948	0.75844	10	1	0.142556	0.604614	10	1	0.0996847	1.16698	0.316964	0.275378	0.188597	0.225415	0.305104	0.344199	0.389358	0.268453	0.255318	0.75844	0.331861	0.181524	0.18316	0.282831	0.130948	0.153463	0.404216	0.388784	0.604614	0.271263	0.142556	0.360304	0.152143	0.354819	0.400848	0.449389	0.675461	0.657577	1.16698	0.526204	0.358124	0.229084	0.0996847
HERV K33	4	1	0.115259	0.257617	11	1	0.169699	0.680847	10	1	0.0767315	0.604614	10	1	0.087071	0.595995	0.115259	0.200275	0.226316	0.257617	0.549187	0.594525	0.454251	0.503349	0.680847	0.632033	0.663722	0.544572	0.18316	0.169699	0.196422	0.0767315	0.101054	0.388784	0.604614	0.406894	0.106917	0.556834	0.228215	0.463994	0.427571	0.374491	0.595995	0.482223	0.437617	0.364295	0.179062	0.0916337	0.398739
HERV K11	4	1	0.128809	0.950891	11	1	0.0565663	0.474025	10	1	0.115097	1.56192	10	1	0.0916337	1.09596	0.950891	0.250344	0.56579	0.128809	0.335614	0.125163	0.194679	0.369123	0.255318	0.474025	0.132744	0.272286	0.152633	0.0565663	0.261896	0.115097	0.50527	1.16635	1.56192	1.15287	0.784055	1.40846	0.380358	0.682344	0.614633	0.262144	0.556262	1.09596	0.547021	0.404772	0.358124	0.0916337	0.132913
HERV K51	4	1	0.0322022	0.115259	11	1	0.0565663	0.551591	10	1	0.0678157	0.503845	10	1	0.0374491	0.175354	0.115259	0.100138	0.113158	0.0322022	0.274594	0.37549	0.551591	0.30201	0.212765	0.158008	0.298675	0.181524	0.0610534	0.0565663	0.065474	0.0767315	0.202108	0.097196	0.503845	0.0678157	0.142556	0.13102	0.152143	0.136469	0.187062	0.0374491	0.158932	0.175354	0.109404	0.121432	0.14325	0.0458168	0.0996847
HERV K4	4	1	0.128809	0.259334	11	1	0.0907619	1.39047	10	1	0.153463	0.806153	10	1	0.0458168	1.67753	0.259334	0.22531	0.150877	0.128809	0.274594	0.594525	0.389358	0.503349	0.382976	1.39047	0.497791	0.0907619	0.396847	0.282831	0.261896	0.153463	0.269477	0.194392	0.806153	0.339078	0.356389	0.360304	0.266251	0.463994	0.507741	0.187246	0.595995	0.219192	1.67753	0.526204	0.752061	0.0458168	0.930391
HERV K68	4	1	0.0754386	0.374593	11	1	0.127659	0.92921	10	1	0.0767315	0.644249	10	1	0.229084	0.635728	0.374593	0.22531	0.0754386	0.289819	0.823781	0.625816	0.421805	0.503349	0.127659	0.474025	0.92921	0.226905	0.36632	0.367681	0.392844	0.0767315	0.269477	0.161993	0.55423	0.644249	0.142556	0.13102	0.45643	0.4367	0.641356	0.449389	0.635728	0.263031	0.364681	0.323818	0.393937	0.229084	0.365511
HERV K37	4	1	0.74065	1.38311	11	1	0.530977	1.70649	10	1	1.38117	2.93056	10	1	0.898779	3.05944	1.38311	0.826135	1.05614	0.74065	1.09837	0.78227	1.00584	1.34226	1.10638	1.70649	0.530977	1.61102	1.43475	1.21618	0.818425	1.38117	2.93056	2.20311	2.11615	1.62758	1.49683	1.70326	2.77661	1.47386	2.11113	0.898779	3.05944	2.06041	1.75047	1.53814	2.04131	0.962154	0.963619
HERV K8	0	0	0	0	3	0.272727	0.0305104	0.0851058	2	0.2	0.0356389	0.0380358	2	0.2	0.0358124	0.0438385	0	0	0	0	0.0305104	0	0	0	0.0851058	0	0	0	0	0	0.032737	0	0	0	0	0	0.0356389	0	0.0380358	0	0	0	0	0.0438385	0	0	0.0358124	0	0
HERV K5	4	1	0.0751032	0.188597	11	1	0.0565663	0.486698	10	1	0.0272937	0.168423	9	0.9	0.0332282	0.404979	0.0864446	0.0751032	0.188597	0.0966065	0.213573	0.438071	0.486698	0.234896	0.170212	0.442423	0.0663722	0.136143	0.18316	0.0565663	0.130948	0.0383658	0.168423	0.0647973	0.100769	0.0678157	0.0356389	0.0327549	0.0380358	0.0272937	0.106893	0.112347	0.39733	0.219192	0.0364681	0.202386	0.107437	0.0458168	0.0332282
HERV K HML-2.HOM	4	1	0.264035	0.450619	11	1	0.317667	1.28292	10	1	0.882412	3.27499	10	1	0.731021	6.15861	0.374593	0.450619	0.264035	0.354224	1.00684	1.28292	0.519144	0.536906	0.595741	1.04285	1.12833	0.317667	0.427374	0.339398	0.458318	0.882412	2.02108	2.10591	3.27499	1.42413	0.926611	1.17918	1.17911	1.47386	2.13785	1.31072	6.15861	4.73456	2.91745	1.17384	2.39943	0.824703	0.731021
HERV K109	4	1	0.230519	0.483032	11	1	0.181524	1.10638	10	1	0.589589	1.76482	10	1	0.636635	1.36087	0.230519	0.300413	0.301754	0.483032	0.610208	0.657107	0.713824	0.637576	1.10638	0.695236	0.829652	0.181524	0.4579	0.565663	0.589266	1.76482	0.673693	0.647973	1.10846	0.949419	0.890972	0.589589	0.684645	1.14634	1.0422	0.636635	1.07279	0.964447	1.27638	1.21432	1.36087	0.87052	0.664565
HERV K107	4	1	0.150877	0.259334	11	1	0.282831	1.16926	10	1	0.235793	0.687854	10	1	0.190578	0.745254	0.259334	0.175241	0.150877	0.225415	0.73225	0.594525	0.648931	0.335566	0.29787	1.16926	0.92921	0.408429	0.427374	0.282831	0.392844	0.613852	0.235793	0.518379	0.403076	0.508618	0.498944	0.687854	0.45643	0.382112	0.481017	0.299593	0.715194	0.745254	0.474085	0.283341	0.358124	0.274901	0.365511
HERV K104	4	1	0.125172	0.225415	11	1	0.113452	0.468082	10	1	0.106917	0.77988	10	1	0.229084	0.482223	0.201704	0.125172	0.150877	0.225415	0.396635	0.344199	0.356912	0.167783	0.468082	0.442423	0.431419	0.113452	0.122107	0.141416	0.261896	0.153463	0.572639	0.421183	0.55423	0.77988	0.106917	0.26204	0.342322	0.354819	0.454294	0.374491	0.39733	0.482223	0.401149	0.323818	0.250687	0.229084	0.365511
HERV K103	4	1	0.22531	0.452632	11	1	0.292019	0.75844	10	1	0.425814	1.06893	10	1	0.485727	1.07279	0.288149	0.22531	0.452632	0.225415	0.518677	0.563234	0.292019	0.604019	0.7234	0.75844	0.431419	0.363048	0.335794	0.395964	0.32737	0.460389	0.640008	0.777568	0.654999	0.576433	0.534583	0.425814	0.494466	0.736931	1.06893	0.748982	1.07279	0.657577	0.583489	0.485727	0.608811	0.687253	0.598108
HERV K102	4	1	1.98823	3.57444	11	1	2.24636	4.47458	10	1	3.80358	10.7823	10	1	4.02596	8.185	1.98823	2.27813	2.67807	3.57444	4.02737	4.47458	3.01753	3.89257	3.10636	4.42423	3.38498	2.24636	2.83898	3.13943	3.01181	5.06428	5.18744	7.2573	10.7823	5.1879	5.66658	7.76292	3.80358	6.68697	7.53594	5.43012	8.185	7.45254	7.11127	4.93822	5.69417	4.30678	6.31337
HERV K101	4	1	0.345778	0.579639	11	1	0.382976	1.42207	10	1	0.383658	1.06917	10	1	0.524288	1.21432	0.345778	0.350482	0.414912	0.579639	0.945823	1.00131	0.648931	0.469793	0.382976	1.42207	0.76328	0.45381	0.518954	0.424247	0.491055	0.383658	0.538954	0.809967	0.957306	0.712065	1.06917	0.884383	0.646609	0.600462	0.881865	0.524288	0.913859	0.964447	1.09404	1.21432	0.966935	0.549802	0.930391
HERV K I and flanking region	4	1	0.633927	0.90166	11	1	0.752951	5.87791	10	1	0.874764	6.09653	10	1	1.09653	5.24475	0.633927	0.876204	0.678948	0.90166	2.19675	2.62843	2.66062	2.28185	1.4468	5.87791	2.35621	2.24636	1.09896	1.07476	0.752951	1.26607	1.98739	0.874764	6.09653	2.23792	1.10481	1.50673	0.988931	1.09175	1.92407	2.84613	5.24475	1.31515	2.91745	3.15722	3.86774	2.01594	1.09653
HERV K II and flanking region	4	1	6.22369	14.5227	11	1	7.0712	17.1967	10	1	5.98506	29.5538	10	1	7.83468	22.5053	14.5227	6.53398	6.22369	7.34209	16.0485	10.1069	17.1967	13.7582	12.1276	16.5593	11.6483	8.577	10.9896	10.6345	7.0712	5.98506	12.5981	12.5059	18.1888	19.124	16.8928	8.6473	29.5538	13.5923	19.1872	17.5262	22.4094	15.5188	9.55463	22.5053	21.5949	7.83468	10.633
HERV K18.1	4	1	0.226316	1.96433	11	1	0.221212	1.31195	10	1	0.47471	3.32538	10	1	0.364295	2.29084	0.461038	0.350482	0.226316	1.96433	1.31195	1.12647	0.584037	0.604019	1.02127	0.221212	1.29426	0.680715	0.244213	0.565663	0.425581	1.03588	0.875801	0.680372	3.32538	0.47471	0.534583	0.720609	3.30912	0.982575	2.24475	1.16092	0.874126	0.657577	1.13051	0.364295	0.823686	2.29084	1.0633
HERV K105 3 LTR	4	1	0.0288149	0.264035	9	0.818182	0.0312908	0.595741	9	0.9	0.0323987	1.283	9	0.9	0.0438385	0.486838	0.0288149	0.100138	0.264035	0.0322022	0.427146	0.0312908	0	0.536906	0.595741	0.0316017	0.365047	0	0.213687	0.593946	0.196422	0.0767315	0.134739	0.0323987	0.856537	0.542525	1.283	0	0.266251	0.163762	0.507741	0.486838	0.119199	0.0438385	0.145872	0.121432	0	0.412352	0.166141
HERV K105 5 LTR	4	1	0.0864446	0.150877	10	0.909091	0.032737	1.40425	9	0.9	0.0327549	0.721526	10	1	0.0476445	0.566681	0.0864446	0.150206	0.150877	0.0966065	0.152552	0	0.0973396	0.570462	1.40425	0.0632033	0.431419	0.0907619	0.152633	0.367681	0.032737	0	0.0673693	0.097196	0.503845	0.678157	0.6415	0.0327549	0.152143	0.21835	0.721526	0.299593	0.198665	0.131515	0.218808	0.566681	0.107437	0.274901	0.199369
HERV K106	3	0.75	0.0250344	0.0644043	11	1	0.0282831	0.244213	6	0.6	0.0339078	0.142556	10	1	0.0332282	0.229084	0	0.0250344	0.0377193	0.0644043	0.0610208	0.0312908	0.162233	0.0335566	0.212765	0.126407	0.0331861	0.0907619	0.244213	0.0282831	0.032737	0	0.0673693	0	0	0.0339078	0.142556	0	0.114107	0.0818812	0.0801696	0.224695	0.039733	0.0438385	0.0364681	0.0809545	0.179062	0.229084	0.0332282
HERV K117	4	1	0.0322022	0.100138	11	1	0.0282831	0.30201	10	1	0.0356389	0.190179	9	0.9	0.0290237	0.238223	0.0864446	0.100138	0.0754386	0.0322022	0.183062	0.250326	0.0973396	0.30201	0.0851058	0.158008	0.16593	0.0907619	0.152633	0.0282831	0.130948	0.0383658	0.134739	0.097196	0.100769	0.169539	0.0356389	0.0655099	0.190179	0.109175	0.0801696	0.187246	0.039733	0.131515	0.145872	0.121432	0.14325	0	0.132913
HERV K118	1	0.25	0.0250344	0.0250344	5	0.454545	0.0226905	0.094805	6	0.6	0.0267232	0.0678157	8	0.8	0.0238223	0.087071	0	0.0250344	0	0	0	0	0.0648931	0.0335566	0	0.094805	0	0.0226905	0.0305267	0	0	0	0	0	0.0503845	0.0678157	0.0356389	0	0.0380358	0.0272937	0.0267232	0.0374491	0	0.0438385	0.0364681	0	0.0358124	0.0458168	0.0332282
HERV K119	3	0.75	0.0250344	0.0377193	9	0.818182	0.0282831	0.219036	5	0.5	0.0267232	0.0655099	7	0.7	0.0374491	0.229084	0	0.0250344	0.0377193	0.0322022	0.0305104	0.219036	0.194679	0.10067	0.212765	0.18961	0.16593	0.158833	0	0.0282831	0	0	0.0336846	0.0647973	0	0	0	0.0655099	0.0380358	0	0.0267232	0.0374491	0.119199	0	0.0729361	0.121432	0	0.229084	0
HERV HCML-ARV	4	1	1.83552	3.35461	11	1	0.469362	1.60411	10	1	0.422023	1.55976	10	1	0.229084	1.81049	2.79504	3.35461	2.67807	1.83552	1.49501	0.469362	1.58988	1.5436	1.40425	1.16926	0.76328	0.589953	0.580007	1.30102	1.60411	0.422023	0.606324	0.842365	0.55423	1.55976	0.712778	0.884383	1.14107	0.709637	0.935312	0.337042	1.31119	1.27132	0.875234	1.09289	1.00275	0.229084	0.531652
HERV K113	4	1	0.40055	0.805054	11	1	0.763645	1.72099	10	1	0.791518	2.2673	10	1	0.641436	1.78798	0.403408	0.40055	0.716667	0.805054	1.64756	1.72099	1.58988	1.67783	1.61701	1.32727	1.59293	0.794167	0.82422	0.763645	0.916637	0.99751	1.11159	1.23115	2.2673	1.25459	1.35428	1.6705	1.33125	0.791518	1.68356	1.12347	1.78798	1.35899	0.984638	1.33575	0.966935	0.641436	1.12976
HERV K115	4	1	0.700963	1.28809	11	1	0.589953	1.73909	10	1	1.25518	3.32538	10	1	1.19837	2.74158	0.778001	0.700963	0.980702	1.28809	1.73909	1.47067	0.908503	1.64427	1.40425	1.54848	1.62612	0.589953	0.82422	1.15961	1.47317	1.38117	1.38107	1.78193	3.32538	1.45804	1.67503	2.71866	1.25518	1.55574	2.05769	1.19837	2.74158	2.36728	2.40689	1.45718	1.719	1.37451	1.32913
HERV K10	4	1	0.150206	0.772852	11	1	0.510635	1.42207	10	1	0.570537	1.91461	10	1	0.595619	1.47012	0.403408	0.150206	0.490351	0.772852	0.854291	0.907433	1.00584	0.872472	0.510635	1.42207	0.829652	0.953	0.702114	0.763645	0.8839	0.959144	0.875801	0.874764	1.91461	0.712065	0.712778	0.982648	0.570537	0.955281	1.22927	1.08602	1.47012	1.44667	0.94817	1.29527	1.146	0.595619	0.863934
HERV K clone SD-C7-34LTR	4	1	0.125172	0.322022	11	1	0.045381	0.594525	10	1	0.304287	0.774972	10	1	0.238223	1.05212	0.144074	0.125172	0.150877	0.322022	0.152552	0.594525	0.421805	0.369123	0.340423	0.442423	0.298675	0.045381	0.18316	0.311115	0.392844	0.383658	0.370531	0.453581	0.654999	0.305171	0.392028	0.491324	0.304287	0.573169	0.774972	0.374491	0.595995	1.05212	0.692893	0.323818	0.286499	0.412352	0.664565
HERV K Y18890.1	4	1	0.230519	1.06267	11	1	0.261896	1.03735	10	1	0.106917	1.86423	10	1	0.238223	1.32869	0.230519	0.275378	0.301754	1.06267	1.03735	0.876142	0.616484	0.738245	0.851058	0.695236	0.862838	0.544572	0.27474	0.367681	0.261896	1.61136	0.471585	0.323987	1.86423	0.678157	0.106917	0.360304	1.63554	0.382112	0.935312	0.86133	0.556262	0.789093	0.802298	0.404772	0.680436	1.32869	0.398739
HERV K clone gP23-C19	4	1	0.288149	0.611841	11	1	0.589266	1.12889	10	1	0.230195	1.10846	10	1	0.299054	1.31119	0.288149	0.525722	0.490351	0.611841	1.12889	1.0326	0.74627	1.04025	0.893611	0.916448	0.862838	0.612643	0.610534	0.622229	0.589266	0.230195	0.471585	0.583176	1.10846	0.644249	0.570222	0.655099	0.45643	0.764225	0.694803	0.636635	1.31119	0.920608	0.510553	0.850022	1.00275	0.412352	0.299054
HERV RTVL-H2	3	0.75	0.0250344	0.0576297	5	0.454545	0.0226905	0.187745	8	0.8	0.0380358	0.352692	5	0.5	0.0716248	0.255277	0.0576297	0.0250344	0.0377193	0	0.0305104	0.187745	0	0	0	0.0316017	0	0.0226905	0.0305267	0	0	0	0.168423	0.0647973	0.352692	0.101724	0	0.163775	0.0380358	0.191056	0.0801696	0.0748982	0.079466	0.175354	0.255277	0	0.0716248	0	0
[truncated: 2 more columns]
