# Supplementary material for: Assessment of viral RNA in idiopathic pulmonary fibrosis using RNA-seq
Source: BMC Pulm Med. 2020 Apr 3;20:81. doi: 10.1186/s12890-020-1114-1 (PMC7119082; doi:10.1186/s12890-020-1114-1)
Supplement: Supplementary file 3 — Additional file 3: Table S3. Counts for virus mapped non-poly(A) selected RNA-seq reads for IPF and control lung RNA. [file 12890_2020_1114_MOESM3_ESM.xlsx]

## Sheet: normalized
normalize to Number of reads mapped to multiple loci | and number of reads mapped to multiple loci	Controls					IPFs					Control					IPF
	min	max	# of samples	% of samples	Average	min	max	# of samples	% of samples	Average	ATP3007	ATP3013	ATP3014	ATP3017	ATP3018	ATP2005	ATP2019	ATP2024	ATP2025	ATP2032	ATP2041	ATP2042	ATP2044	ATP2048	ATP2049	ATP2051	ATP2053
human cytomegalovirus	0	1014.64	3	0.6	202.936	0	1.24754	6	0.5	0.177255	0	1014.64	0	0.0217263	0.0126035	0	0.188424	1.24754	0.0244294	0	0	0	0	0	0.0865077	0.0213552	0.558806
Hepatitis C virus genotype 2	1.39899	2.91132	5	1	2.05461	0.965211	5.34959	12	1	2.56539	1.5631	2.68015	1.71951	2.91132	1.39899	1.81832	2.71331	2.26983	1.86885	5.34959	2.52903	3.588	3.5935	1.92298	1.83829	2.32771	0.965211
Hepatitis C virus genotype 6	0.300596	0.738693	5	1	0.488056	0.264163	1.14708	12	1	0.614538	0.300596	0.605611	0.429876	0.738693	0.365503	0.458159	0.452219	0.606444	0.622949	1.14708	0.698626	0.717601	0.714304	0.662011	0.464979	0.565912	0.264163
Tick-borne encephalitis virus	0.144286	0.294772	5	1	0.234029	0.125753	0.329212	12	1	0.224342	0.144286	0.283478	0.294772	0.195536	0.252071	0.272032	0.288918	0.329212	0.244294	0.250273	0.125753	0.282335	0.175829	0.236432	0.205456	0.149486	0.132081
Hepatitis C virus genotype 1	0.072143	0.217263	5	1	0.150578	0.0508006	0.364982	12	1	0.159043	0.072143	0.0901974	0.184233	0.217263	0.189053	0.11454	0.175863	0.103962	0.146576	0.364982	0.209588	0.11764	0.241764	0.157622	0.0756942	0.149486	0.0508006
Abelson murine leukemia virus	0.0480953	0.113432	5	1	0.0874981	0.0320328	0.293423	12	1	0.138163	0.0480953	0.103083	0.0859753	0.0869051	0.113432	0.0859049	0.113055	0.17327	0.146576	0.229417	0.293423	0.141167	0.076925	0.0630487	0.140575	0.0320328	0.162562
Shamonda virus	0.0120238	0.17645	5	1	0.0819816	0.0139725	0.223523	12	1	0.0861454	0.0120238	0.128853	0.0491287	0.0434526	0.17645	0.0429524	0.100493	0.0519809	0.0610734	0.0208561	0.0139725	0.129403	0.186818	0.0630487	0.0648807	0.0747431	0.223523
Cutthroat trout virus	0	0.0515414	4	0.8	0.0219712	0	0.0432538	11	0.916667	0.0245814	0.0120238	0.0515414	0.0245644	0.0217263	0	0.0143175	0.0125616	0.0346539	0.036644	0.0312841	0.0139725	0.011764	0.0329679	0.0315243	0.0432538	0.0320328	0
Murine type C retrovirus	0	0.038656	4	0.8	0.0193424	0	0.017327	5	0.416667	0.00526054	0.0240477	0.038656	0.0122822	0.0217263	0	0	0	0.017327	0	0	0.0139725	0	0.0109893	0	0	0.0106776	0.0101601
Simbu virus	0	0.0378106	3	0.6	0.0175085	0	0.111761	8	0.666667	0.0237307	0	0.0128853	0.0368466	0	0.0378106	0	0.0125616	0	0.036644	0	0.0139725	0.011764	0.0549465	0	0.0324404	0.0106776	0.111761
Moloney murine leukemia virus	0	0.0434526	2	0.4	0.0159048	0	0.0108135	1	0.0833333	0.000901122	0.0360715	0	0	0.0434526	0	0	0	0	0	0	0	0	0	0	0.0108135	0	0
Herpes simplex virus 1	0	0.0128853	1	0.2	0.00257707	0	0.0108135	1	0.0833333	0.000901122	0	0.0128853	0	0	0	0	0	0	0	0	0	0	0	0	0.0108135	0	0
Herpes simplex virus 2	0	0.0378106	2	0.4	0.0101392	0	0.0419176	7	0.583333	0.0134616	0	0.0128853	0	0	0.0378106	0	0	0.017327	0.036644	0	0.0419176	0.0235279	0.0109893	0	0.0108135	0	0.0203202
Epstein-barr virus	0	0.0515414	1	0.2	0.0103083	0	0.0320328	5	0.416667	0.00819008	0	0.0515414	0	0	0	0	0	0	0.0122147	0.010428	0	0	0.0219786	0	0.0216269	0.0320328	0
Roseolovirus	0	0.0257707	1	0.2	0.00515414	0	0.011764	1	0.0833333	0.000980329	0	0.0257707	0	0	0	0	0	0	0	0	0	0.011764	0	0	0	0	0
Human herpesvirus 7	0	0.0217263	1	0.2	0.00434526	0	0.0219786	3	0.25	0.00445935	0	0	0	0.0217263	0	0	0	0	0	0.0208561	0	0	0.0219786	0	0	0.0106776	0
Human coronavirus 229E	0	0.0126035	1	0.2	0.00252071	0	0.0208561	3	0.25	0.00360814	0	0	0	0	0.0126035	0	0	0	0	0.0208561	0	0.011764	0	0	0	0.0106776	0
Small anellovirus 1	0	0.0128853	1	0.2	0.00257707	0	0	0	0	0	0	0.0128853	0	0	0	0	0	0	0	0	0	0	0	0	0	0	0
Human parvovirus B19	0	0	25	5	0	0	0	0	0	0	0	0	0	0	0	0	0	0	0	0	0	0	0	0	0	0	0
