# Supplementary material for: Assessment of viral RNA in idiopathic pulmonary fibrosis using RNA-seq
Source: BMC Pulm Med. 2020 Apr 3;20:81. doi: 10.1186/s12890-020-1114-1 (PMC7119082; doi:10.1186/s12890-020-1114-1)
Supplement: Supplementary file 5 — Additional file 5: Table S5. Counts for virus mapped SRA RNA-seq reads for IPF and control lung RNA. [file 12890_2020_1114_MOESM5_ESM.xlsx]

## Sheet: Sheet1
	virus	Control				IPF				Control					IPF						Average
		# of samples	% of samples	Min	Max	# of samples	% of samples	Min	Max	SRR3715876	SRR3715877	SRR3715878	SRR3715879	SRR3715880	SRR3715870	SRR3715871	SRR3715872	SRR3715873	SRR3715874	SRR3715875	control	IPF
	Tick-borne encephalitis virus	2	0.4	0	0.109035	2	0.333333	0	0.0594534	0	0	0.109035	0	0.0217836	0	0	0	0.0281638	0	0.0594534	0.0261638	0.0146029
	Hepatitis C virus genotype 1	5	1	0.0348754	3.6345	6	1	0.14122	1.07022	0.0348754	2.22018	3.6345	3.48388	3.11506	0.763492	0.468854	0.239605	1.07022	0.14122	0.683714	2.4977	0.561185
	Hepatitis C virus genotype 6	3	0.6	0	0.0440998	2	0.333333	0	0.0334896	0	0	0.036345	0.0440998	0.0217836	0	0.0334896	0	0.0281638	0	0	0.0204457	0.0102756
	Hepatitis C virus genotype 2	4	0.8	0	0.109035	5	0.833333	0	0.0891801	0	0.0267492	0.109035	0.0220499	0.0435673	0.0610793	0.0334896	0	0.0281638	0.0282441	0.0891801	0.0402803	0.0400261
Z	Adenovirus C	5	1	0.0220499	0.325504	6	1	0.778718	3.267	0.325504	0.106997	0.21807	0.0220499	0.0871345	0.88565	1.57401	0.778718	3.267	0.819078	1.66469	0.151951	1.49819
	Adenovirus E	0	0	0	0	1	0.166667	0	0.0297267	0	0	0	0	0	0	0	0	0	0	0.0297267	0	0.00495445
	Herpesvirus 1	0	0	0	0.348538	1	0.166667	0	0.0610793	0	0	0	0.198449	0.348538	0.0610793	0	0	0	0	0	0.109397	0.0101799
	Herpesvirus 2	1	0.2	0	0.0440998	5	0.833333	0	0.0305397	0	0	0	0.0440998	0	0.0305397	0	0.0199671	0.0281638	0.0282441	0.0297267	0.00881996	0.0227736
	Epstein-Bar virus	1	0.2	0	0.036345	1	0.166667	0	0.140819	0	0	0.036345	0	0	0	0	0	0.140819	0	0	0.00726901	0.0234698
	Cytomegalovirus	4	0.8	0	0.413889	2	0.333333	0	0.0891801	0.0116251	0	0.181725	0.0661497	0.413889	0	0	0	0.0563276	0	0.0891801	0.134678	0.0242513
	Herpesvirus 7	3	0.6	0	0.0726901	0	0	0	0	0	0	0.0726901	0.0661497	0.0217836	0	0	0	0	0	0	0.0321247	0
	Kaposi's sarcoma-associated herpesvirus	1	0.2	0	0.0217836	1	0.166667	0	0.0199671	0	0	0	0	0.0217836	0	0	0.0199671	0	0	0	0.00435673	0.00332785
	Cutthroat trout virus	0	0	0	0	3	0.5	0	0.0305397	0	0	0	0	0	0.0305397	0	0.0199671	0	0.0282441	0	0	0.0131251
	Measles virus	0	0	0	0	2	0.333333	0	0.0305397	0	0	0	0	0	0.0305397	0	0	0	0.0282441	0	0	0.00979729
	Abelson murine leukemia virus	5	1	0.0116251	0.308699	1	0.166667	0	0.0305397	0.0116251	0.0802476	0.109035	0.308699	0.108918	0.0305397	0	0	0	0	0	0.123705	0.00508995
	Shamonda virus	3	0.6	0	0.0534984	1	0.166667	0	0.0305397	0	0.0534984	0.036345	0	0.0217836	0.0305397	0	0	0	0	0	0.0223254	0.00508995
	Simian virus 40	5	1	0.0232503	0.457456	5	0.833333	0	0.0594534	0.0232503	0.0534984	0.181725	0.132299	0.457456	0.0305397	0.0334896	0.0199671	0.0281638	0	0.0594534	0.169646	0.0286023
	Papillomavirus 28	0	0	0	0	1	0.166667	0	0.0297267	0	0	0	0	0	0	0	0	0	0	0.0297267	0	0.00495445
	Papillomavirus 100	0	0	0	0	1	0.166667	0	0.0281638	0	0	0	0	0	0	0	0	0.0281638	0	0	0	0.00469397
